# Supplementary material
Source: PubMed Central journal article supplement (PMC2986556)
Supplement: ejhg20092x1.pdf [file ejhg20092x1.pdf]

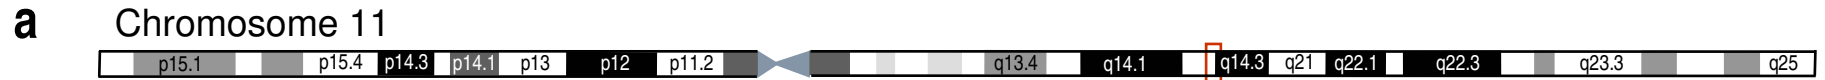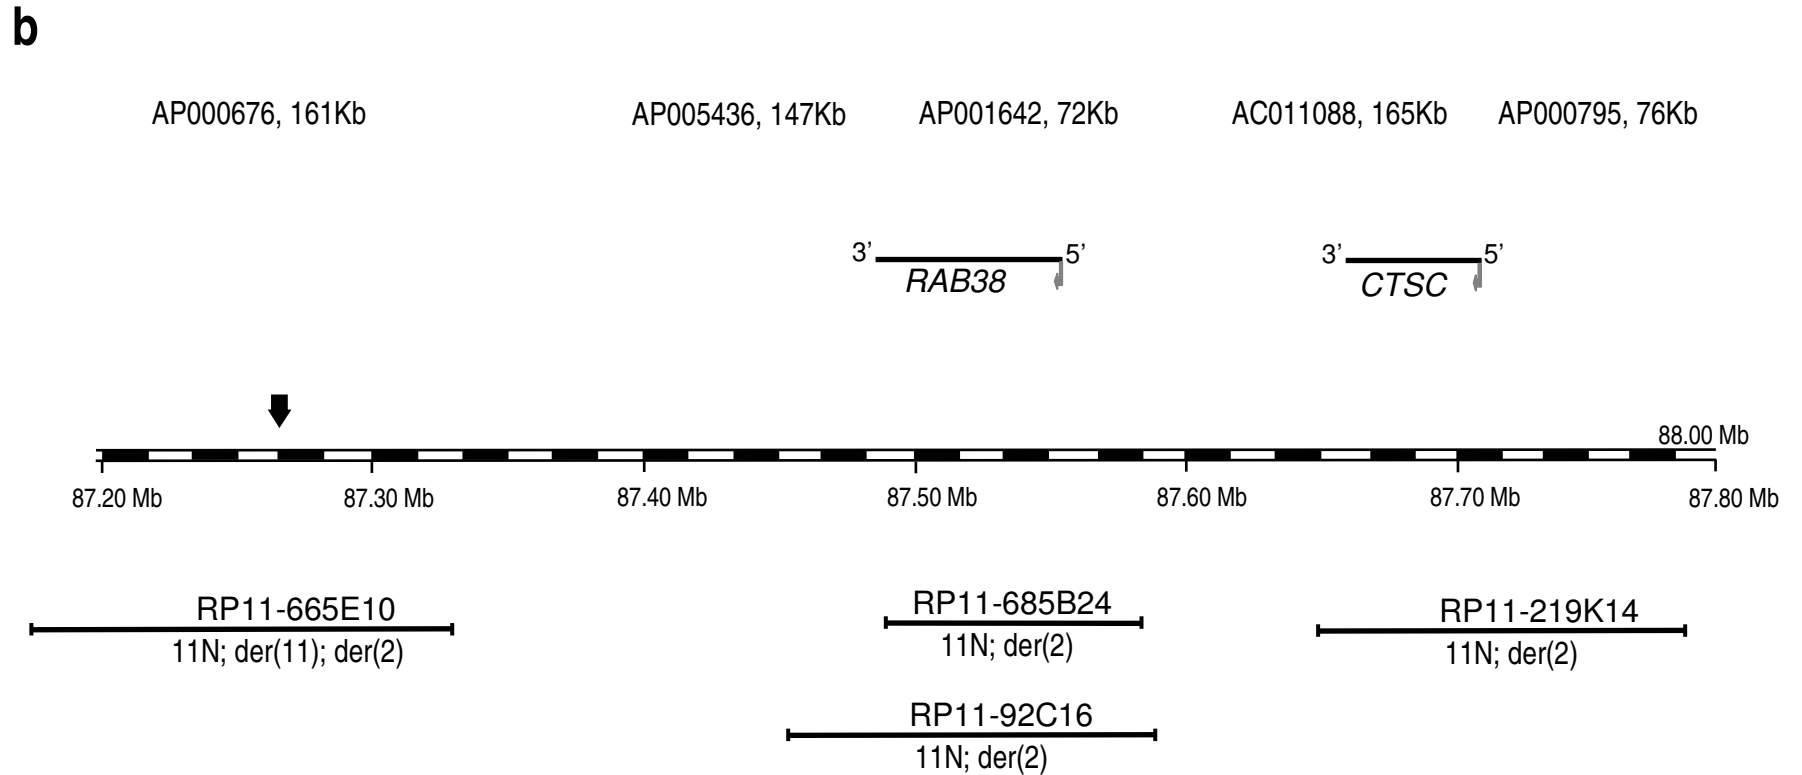

**Supplementary Figure 1** Schematic representation of the chromosome 11 breakpoint region of the t(2;11) associated with isolated SFM.

(a) Schematic ideogram of chromosome 11; the breakpoint region is highlighted by a box. (b) Physical map of the chromosome 11 breakpoint region. GeneBank sequence acc. no. of BAC clones across the breakpoint region and the genes localised in this region are indicated above the map. Horizontal lines denote BAC clones used as FISH probes. The localization of hybridisation signals are annotated below the clones.
